# Supplementary material
Source: PubMed Central journal article supplement (PMC3145095)

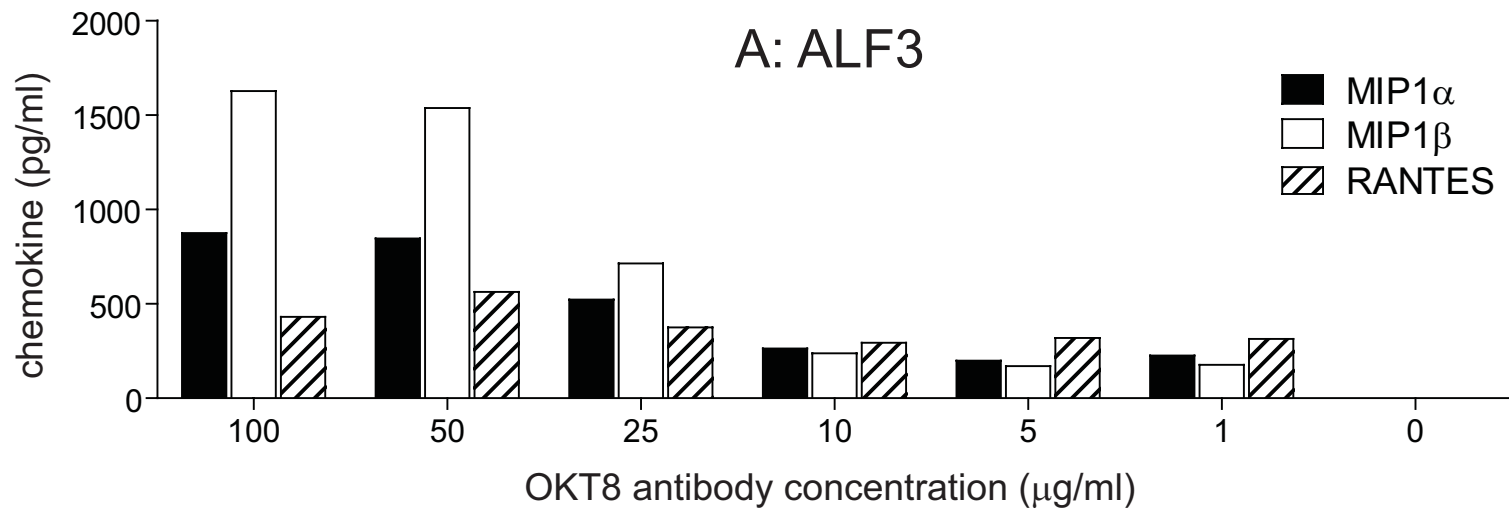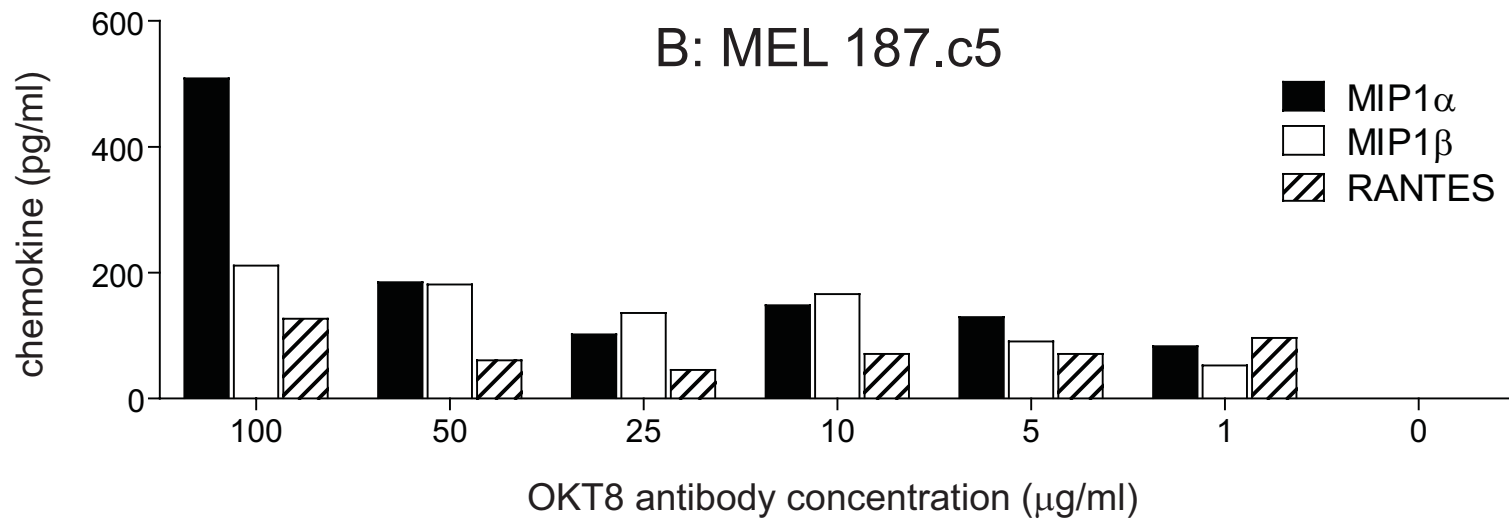

Supplement: NIHMS35902-supplement-2.pdf [file NIHMS35902-supplement-2.pdf]

A

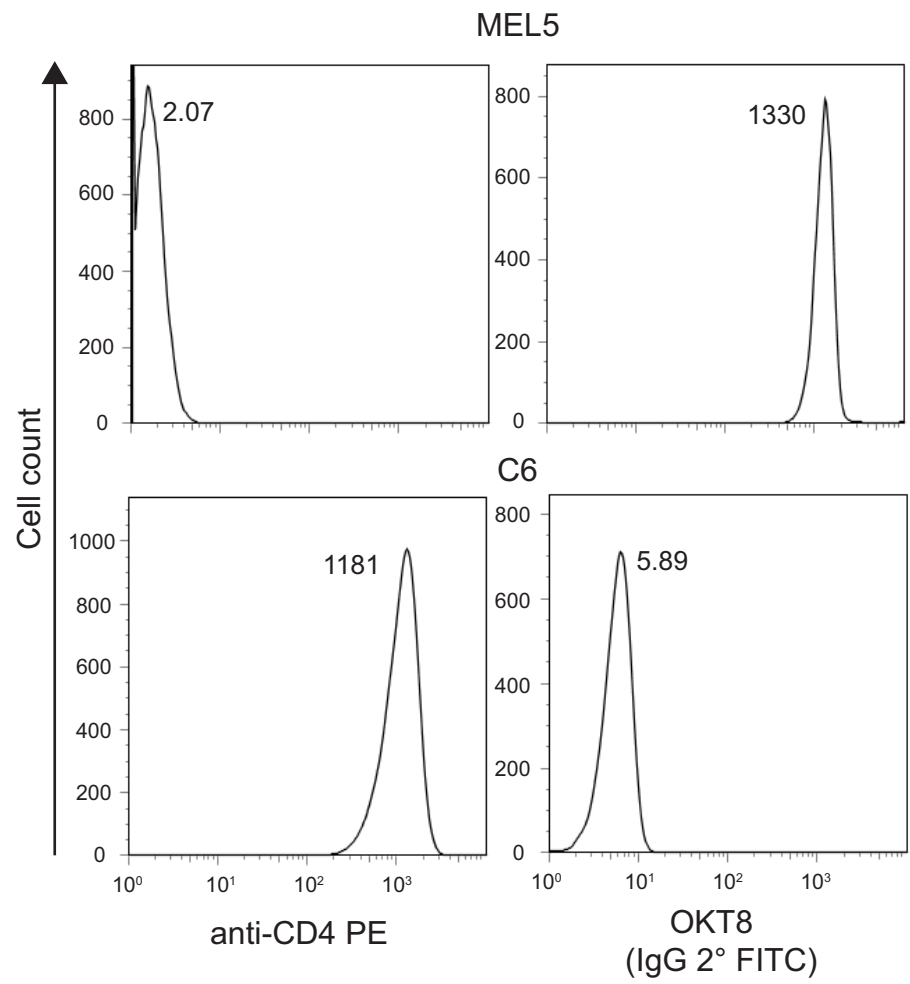

B

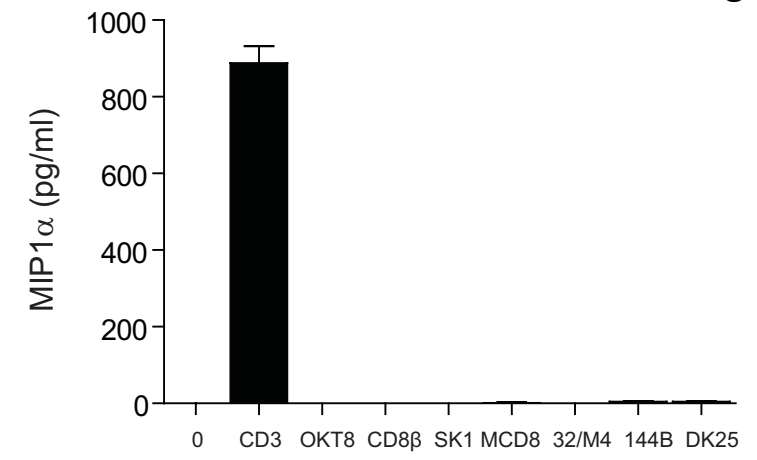

C

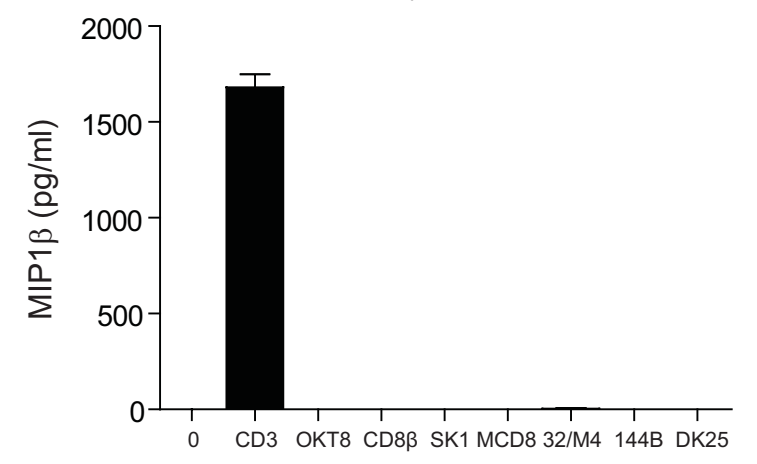

D

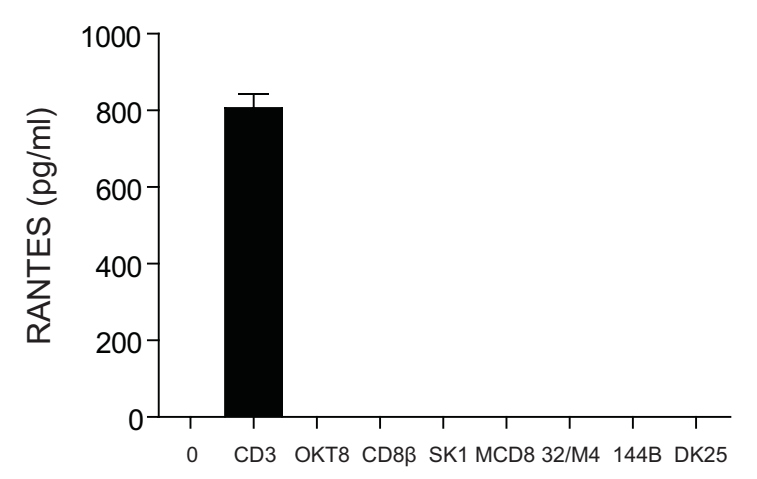

Supplement: NIHMS35902-supplement-3.pdf [file NIHMS35902-supplement-3.pdf]

Figure S3

MEL5 TCR

MEL187.c5 TCR

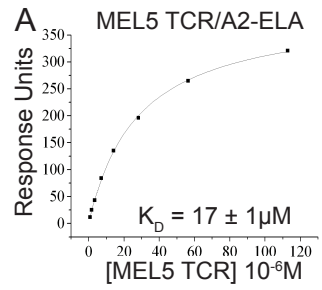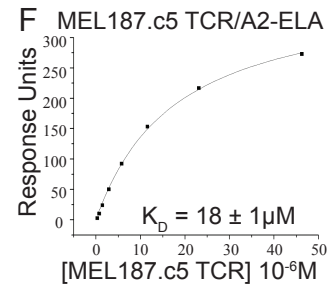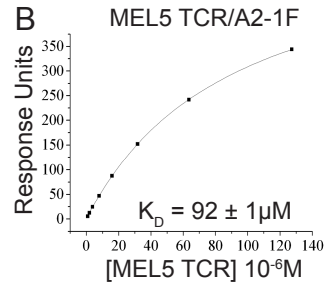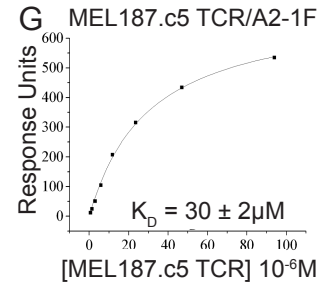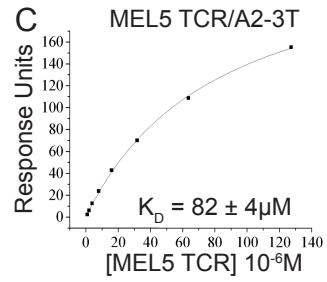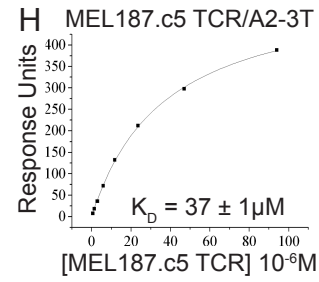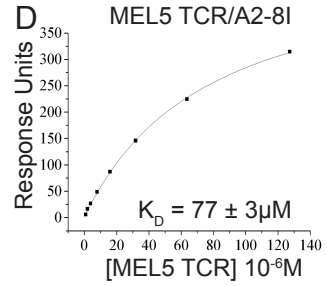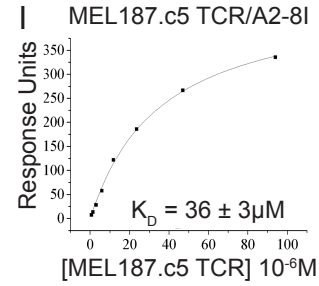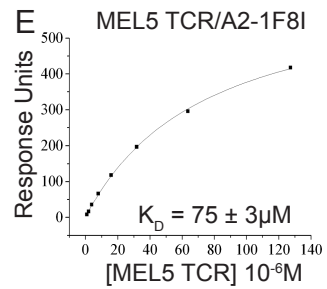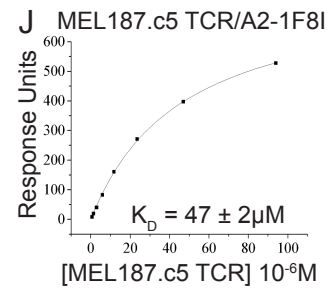

Supplement: NIHMS35902-supplement-4.pdf [file NIHMS35902-supplement-4.pdf]

Figure S4

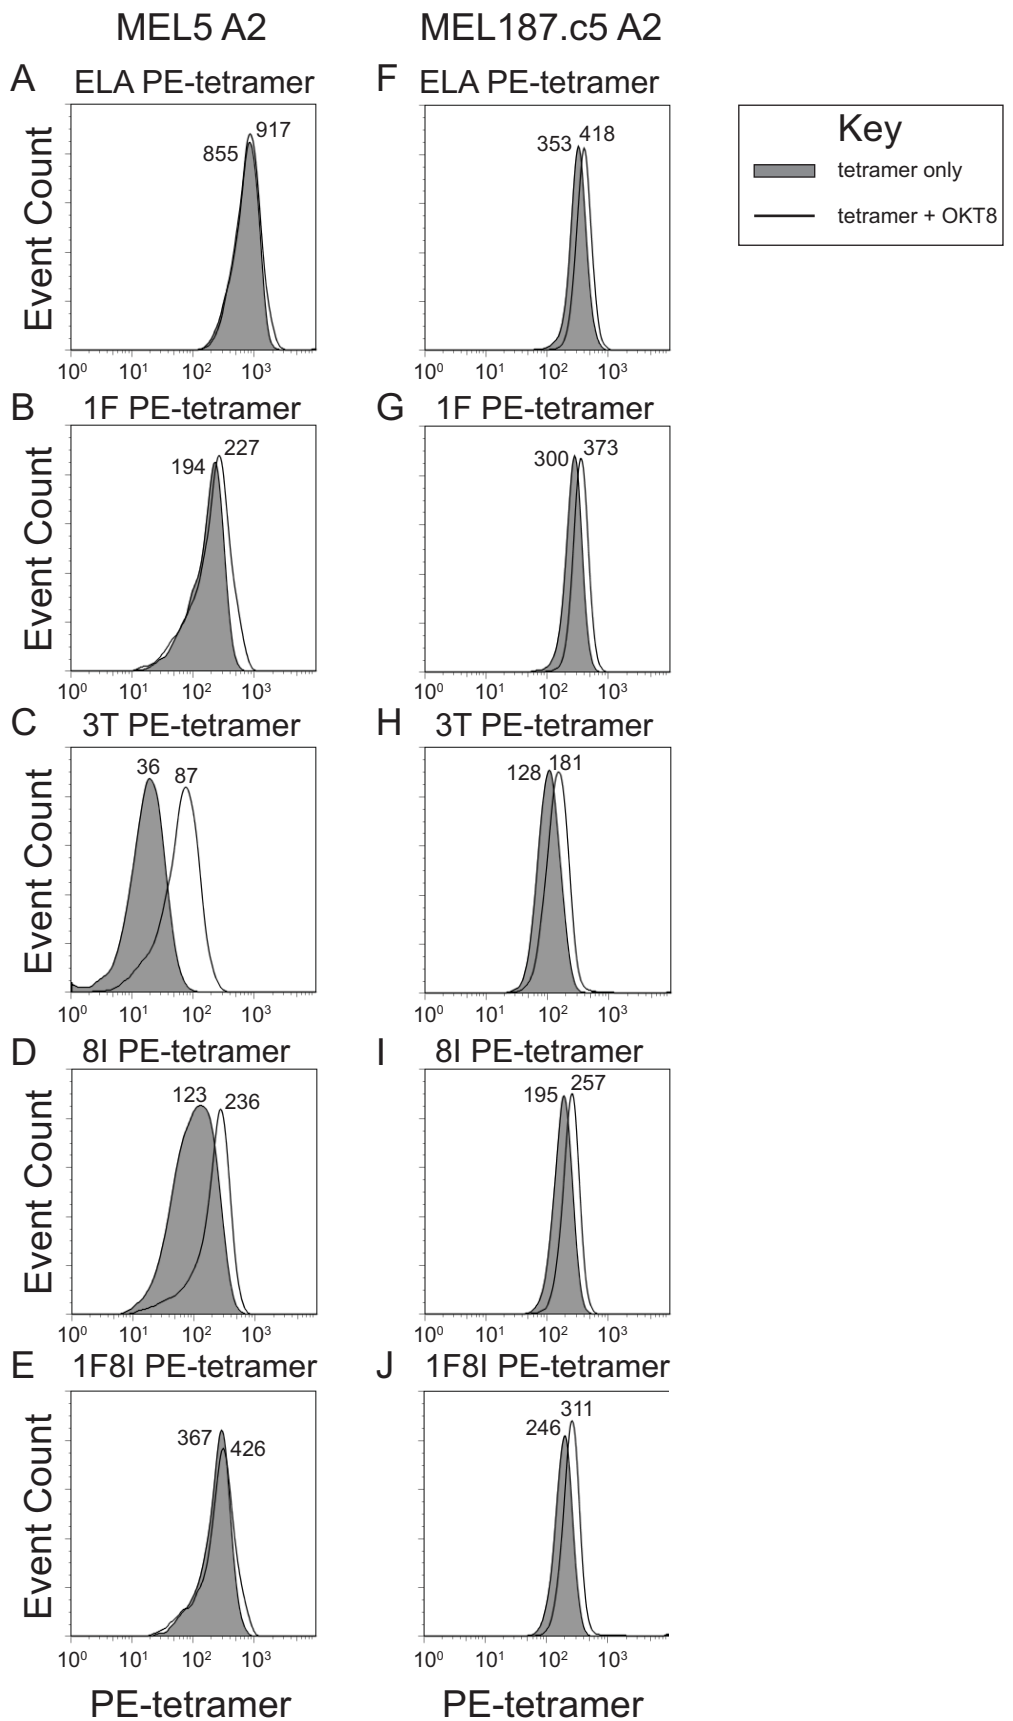

Supplement: NIHMS35902-supplement-5.pdf [file NIHMS35902-supplement-5.pdf]
